# Supplementary material
Source: PubMed Central journal article supplement (PMC10666075)

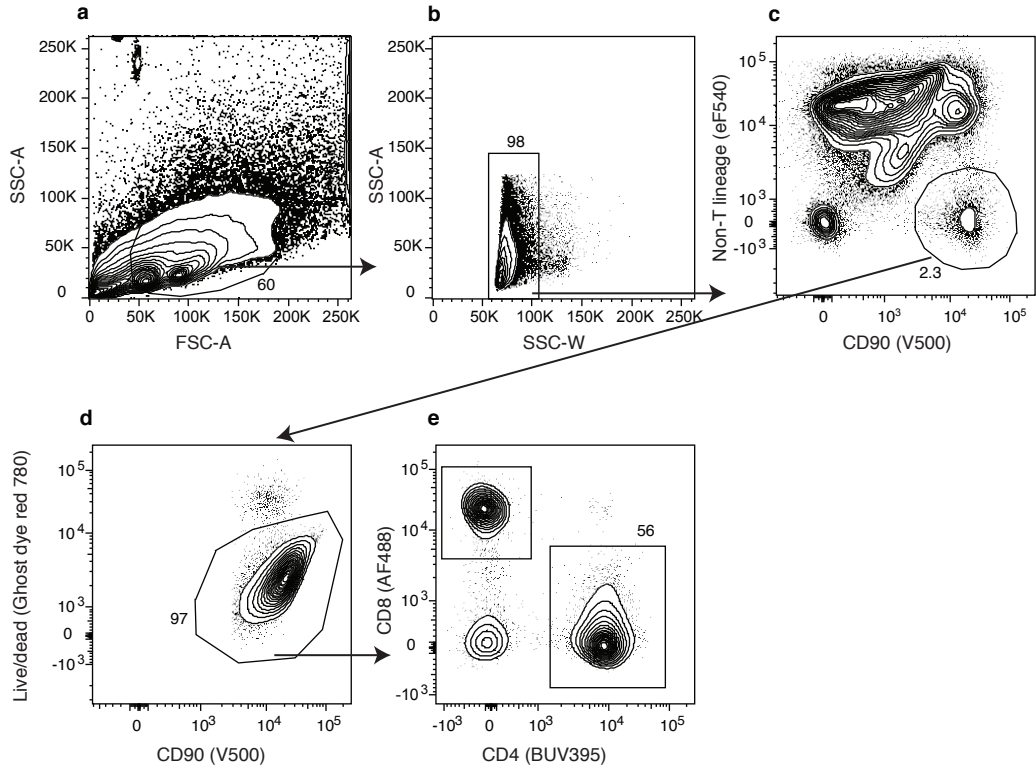

Supplement: NIHMS1941282-supplement-Supplementary_Figure_1.pdf [file NIHMS1941282-supplement-Supplementary_Figure_1.pdf]
